# Supplementary material for: Diacylglycerols interact with the L2 lipidation site in TRPC3 to induce a sensitized channel state
Source: PubMed Central journal article supplement (PMC9253791; doi:10.15252/embr.202154276), 2022-05-23
Supplement: EMBR-23-e54276-s001.pdf [file EMBR-23-e54276-s001.pdf]

# **Diacylglycerols interact with the L2 lipidation site in TRPC3 to induce a sensitized channel state**

**Hazel Erkan-Candag<sup>1,#</sup>, Amy Clarke<sup>2,#</sup>, Oleksandra Tiapko<sup>1</sup>, Mathias A.F. Gsell<sup>1</sup>, Thomas Stockner<sup>2,\*</sup> and Klaus Groschner<sup>1,\*\*</sup>**

<sup>1</sup> Gottfried-Schatz-Research-Center – Biophysics, Medical University of Graz, Graz, Austria

<sup>2</sup> Institute of Pharmacology, Medical University of Vienna, Vienna, Austria

\*Corresponding author. Tel: +43 1 40160 31215; E-mail:

[thomas.stockner@meduniwien.ac.at](mailto:thomas.stockner@meduniwien.ac.at);

\*\*Corresponding author. Tel.: +43 316 385 71500; E-mail: [klaus.groschner@medunigraz.at](mailto:klaus.groschner@medunigraz.at)

# Authors contributed equally

## **Appendix Table of Contents**

### **Appendix Figures:**

**Appendix Figure S1. Fluorescence images of WT and mutant TRPC3 membrane targeting.....2**

### **Appendix Table:**

**Appendix Table S1. Speed of current activation and power with repetitive photostimulation.....4**

**Appendix Table S2. Membrane systems used in this paper.....5**

**Appendix Table S3. Lower and upper bounds of the parameter set for curve fitting.....6**

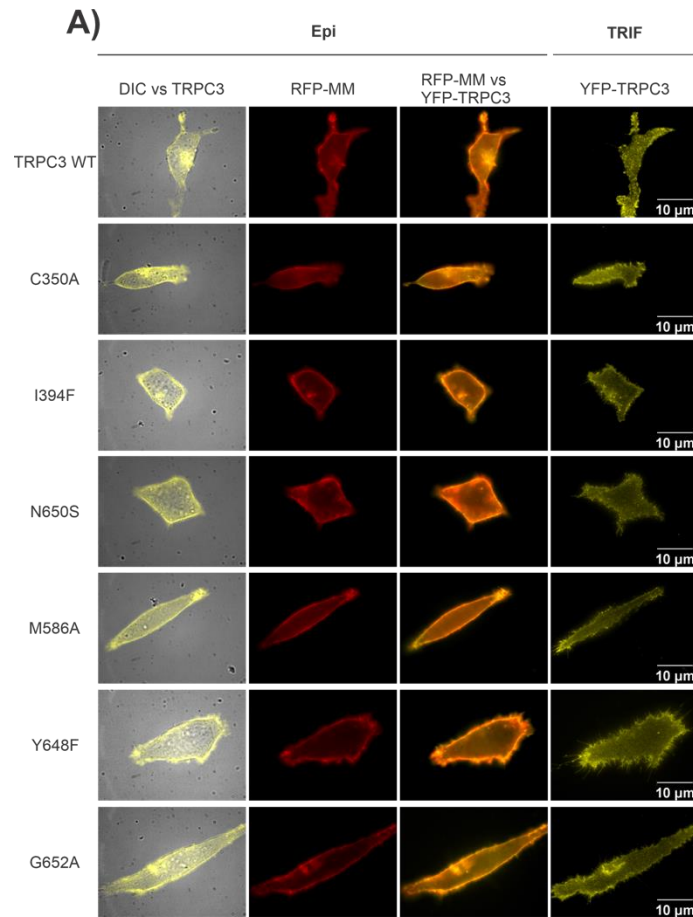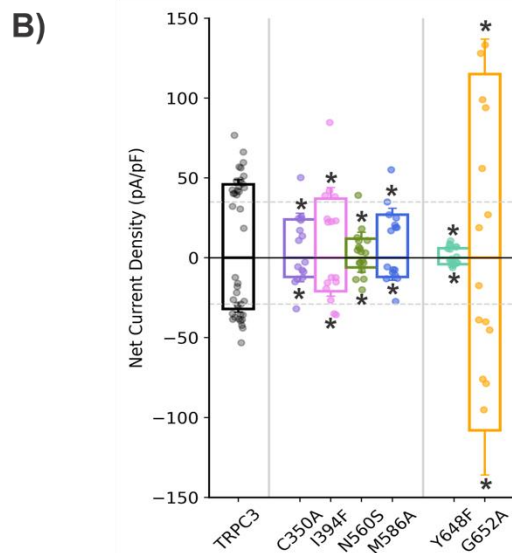

**Appendix Figure S1 - Fluorescence images of WT and mutant TRPC3 membrane targeting.**

A. representative epifluorescence (EF) and TIRF images of single cells expressing TRPC3 WT and TRPC3 mutants (L1 Mutants: C350A; I394F; N560S; M586A; L2 Mutants: Y648F; G652A). N = number of cells measured > 6 for each of the construct; scale bar = 10  $\mu\text{m}$ .

B. Mean net current densities of GSK (10  $\mu$ M)-stimulated inward and outward currents through TRPC3-WT (black) and mutant channels (color-coded as indicated) expressed in HEK293 cells. Values from individual experiments are shown for each of the columns (circles). Number of biological repetitions for each condition  $\geq 6$ . Data are mean  $\pm$  S.E.M; two-tailed t-test or Mann-Whitney test were applied between TRPC3-WT and mutants; \*P < 0.05.

| <b>Constructs</b> | <b>1<sup>st</sup> UV ON</b><br><b><math>\tau \pm \text{SEM}</math></b> | <b>2<sup>nd</sup> UV ON</b><br><b><math>\tau \pm \text{SEM}</math></b> | <b>1<sup>st</sup> UV ON</b><br><b>N (Power)</b> | <b>2<sup>nd</sup> UV ON</b><br><b>N (Power)</b> |
|-------------------|------------------------------------------------------------------------|------------------------------------------------------------------------|-------------------------------------------------|-------------------------------------------------|
| TRPC3             | 1127 $\pm$ 250                                                         | 128 $\pm$ 7                                                            | 3.6 $\pm$ 0,7                                   | 2.0 $\pm$ 0,2                                   |
| C350A             | 1130 $\pm$ 328                                                         | 96 $\pm$ 20                                                            | 3.6 $\pm$ 1,4                                   | 3.3 $\pm$ 0,5                                   |
| I394F             | 1106 $\pm$ 185                                                         | 113 $\pm$ 13                                                           | 3.6 $\pm$ 1,6                                   | 2.1 $\pm$ 0,3                                   |
| N650S             | 897 $\pm$ 153                                                          | 106 $\pm$ 16                                                           | 3.5 $\pm$ 0,5                                   | 3.3 $\pm$ 0,9                                   |
| M586A             | 1029 $\pm$ 422                                                         | 121 $\pm$ 8                                                            | 3.2 $\pm$ 0,7                                   | 2.8* $\pm$ 0,3                                  |
| Y648F             | 990 $\pm$ 292                                                          | 44* $\pm$ 8                                                            | 2.7 $\pm$ 0,9                                   | 9.9* $\pm$ 1,2                                  |
| G652A             | 2918* $\pm$ 647                                                        | 118 $\pm$ 3                                                            | 3.6 $\pm$ 1                                     | 2.5 $\pm$ 0,5                                   |

**Appendix Table S1 - Speed of current activation and power with repetitive photostimulation.**

Number of biological repetitions  $\geq$  6. Data are mean  $\pm$  S.E.M.; two-tailed t-test or Mann-Whitney test were applied between TRPC3-WT and mutants; \*P < 0.05.

| <b>System</b>        | <b>Lipid ratios, inner leaflet (%)</b>         | <b>Lipid ratios, outer leaflet (%)</b> | <b>Length (<math>\mu</math>s)</b> |
|----------------------|------------------------------------------------|----------------------------------------|-----------------------------------|
| <i>Control</i>       | Chol (30), PC (20), PE (35), PS (15)           | Chol (30), PC (60), PE (10)            | 20                                |
| <i>2% DAG (SAG)</i>  | DAG (2), Chol (28), PC (20), PE (35), PS (15)  | Chol (30), PC (60), PE (10)            | 40                                |
| <i>10% DAG (SAG)</i> | DAG (10), Chol (20), PC (20), PE (35), PS (15) | Chol (30), PC (60), PE (10)            | 20                                |

**Appendix Table S2 - Membrane systems used in this paper.**

The abbreviations used in this table are: PC (phosphatidylcholine, POPC 1-palmitoyl-2-oleoyl-sn-glycero-3-phosphatidylcholine), Chol (cholesterol, CHOL), PE (phosphatidylethanolamine, POPE 1-palmitoyl-2-oleoyl-sn-glycero-3-phosphatidylethanolamine), PS (phosphatidylserine, POPS 1-palmitoyl-2-oleoyl-sn-glycero-3-phosphatidylserine), and DAG (diacylglycerol, specifically stearyl-arachidonoyl glycerol, PADG stearyl-arachidonoyl-diacylglycerol).

| <i>lb</i> |        |     |        | <i>ub</i> |
|-----------|--------|-----|--------|-----------|
| $-\infty$ | $<$    | $A$ | $\leq$ | $0$       |
| $0$       | $\leq$ | $S$ | $<$    | $+\infty$ |
| $10$      | $\leq$ | $T$ | $<$    | $+\infty$ |
| $1$       | $\leq$ | $P$ | $<$    | $+\infty$ |
| $-\infty$ | $<$    | $K$ | $\leq$ | $0$       |
| $-\infty$ | $<$    | $C$ | $<$    | $+\infty$ |

**Appendix Table S3 - Lower and upper bounds of the parameter set for curve fitting.**
